# Supplementary material for: Disseminating results to clinical trial participants: a qualitative review of patient understanding in a post-trial population
Source: PubMed Central journal article supplement — BMJ Open. 2012 Sep 24;2(5):e001252. doi: 10.1136/bmjopen-2012-001252 (PMC3467635; doi:10.1136/bmjopen-2012-001252), 2012-09-24
Supplement: bmjopen-2012-001252.draft_revisions.pdf [file bmjopen-2012-001252.draft_revisions.pdf]

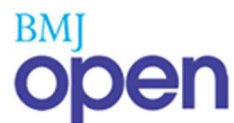

**DISSEMINATING RESULTS TO CLINICAL TRIAL PARTICIPANTS: A QUALITATIVE REVIEW OF PATIENT UNDERSTANDING IN A POST-TRIAL POPULATION**

|                                 |                                                                                                                              |
|---------------------------------|------------------------------------------------------------------------------------------------------------------------------|
| Journal:                        | <i>BMJ Open</i>                                                                                                              |
| Manuscript ID:                  | bmjopen-2012-001252                                                                                                          |
| Article Type:                   | Research                                                                                                                     |
| Date Submitted by the Author:   | 17-Apr-2012                                                                                                                  |
| Complete List of Authors:       | Darbyshire, Julie; University of Oxford, Diabetes Trials Unit<br>Price, Hermione; University of Oxford, Diabetes Trials Unit |
| <b>Primary Subject Heading</b>: | Communication                                                                                                                |
| Secondary Subject Heading:      | Diabetes and endocrinology, Ethics, Patient-centred medicine                                                                 |
| Keywords:                       | MEDICAL ETHICS, General diabetes < DIABETES & ENDOCRINOLOGY, QUALITATIVE RESEARCH                                            |
|                                 |                                                                                                                              |

SCHOLARONE™  
Manuscripts

1  
2  
3  
4  
5  
6  
7  
8  
9  
10  
11  
12  
13  
14  
15  
16  
17  
18  
19  
20  
21  
22  
23  
24  
25  
26  
27  
28  
29  
30  
31  
32  
33  
34  
35  
36  
37  
38  
39  
40  
41  
42  
43  
44  
45  
46  
47  
48  
49  
50  
51  
52  
53  
54  
55  
56  
57  
58  
59  
60

**Disseminating results to clinical trial participants: a qualitative review of patient understanding in a post-trial population**

**Word Count: 1494**

For peer review only

## Structured Abstract

Objective: To identify the most appropriate format for results dissemination to maximise understanding

Design: Qualitative

Setting: Of the original 58 4-T Trial centres, 34 from the UK agreed to take part in this ancillary research.

Participants: All participants from these centres were eligible. 455 participants were sent questionnaires. 40 were completed and returned.

Primary & Secondary outcome measures: The low response rate meant that we were unable to make any firm conclusions about the patient preferred method of dissemination however we were able to comment on the level of understanding demonstrated by the trial participants.

Results: The returned questionnaires demonstrated broad satisfaction with the results letter circulated, general enthusiasm for the trial and a variable level of understanding of the results, however there was a high proportion of responders who were not clear on why the research was undertaken or what the results meant.

Conclusions: The low response rate is likely to reflect a biased cohort who were both enthusiastic about the research and who had a good experience during their three years in the trial. It is perhaps not surprising therefore that the overview is positive. That this population was still not fully informed about the purpose of the research would seem to confirm a low level of understanding amongst the general public which we suggest should be addressed during the consent process.

Trial Registration: Original 4-T Trial Registration ISRCTN51125379

## Summary

### Article Focus

\* Investigation into participant satisfaction with method of dissemination and understanding of clinical trial results

\* Exploration into reasons for participation in clinical trials

### Key Messages

\* Responders were broadly satisfied with their trial experience

\* Responders did not demonstrate good understanding of results beyond their own treatment needs

\* Responders reported a variety of reasons for taking part in the research including physician recommendation and altruism.

### Strengths and Limitations

\* The low response rate was disappointing, especially as it is likely that those who returned their questionnaires had a positive trial experience leading to a bias in the results

\* That this motivated population still demonstrated limited understanding indicates that more needs to be done at the time of consent and during the trial

## Objective

Clinical trial results are generally published solely within the healthcare community and rarely disseminated beyond scientific publications[1]. However, it is increasingly a requirement of ethical and regulatory approvals that the public is involved where possible in all stages of research, and that results are shared with the patients who took part. As a result of this interest in public and patient involvement it is now common for dissemination plans to form part of initial study proposals[1]. Researchers are therefore encouraged to share results with patients but there remains no consensus on the best method for doing this. Additionally, although patients participate willingly in clinical trials, it is not known if they are interested in knowing the results of the research to which they have contributed. It is also not known if they are aware of the reasons for the research. Previously we collected information retrospectively from clinical centres who held a patient event to share the one-year results from the three-year Treat to Target in Type 2 Diabetes (4-T) Trial[2] (Current Controlled Trials number, ISRCTN51125379). We discussed our experience and made suggestions for how the information collected could be used to inform further work in this area[3].

The ‘coffee morning’ approach was popular with patients, and staff did not find this onerous to organise, but whilst patients were aware of the implications for their personal future care, it remained unclear if patients fully understood the results of the study as a whole.

We decided to review patient understanding of the final results from the 4-T Trial which were also published and circulated to all participants. This open-label, multi-centre trial randomised 708 participants with type 2 diabetes which was suboptimally controlled with oral antihyperglycaemic therapy (glycated haemoglobin 7.0–10.0%) to the addition of a basal, biphasic or prandial insulin regimen. Patients were followed for three years and a second insulin formulation was added if glycaemic control remained inadequate. The final results concluded that patients initiated onto the long acting insulin detemir who

later added prandial doses of aspart achieved good glycaemic control with a lower risk of hypoglycaemia and less weight gain than patients initiated onto either the biphasic aspart or aspart insulins[4].

## Design

Simultaneous to publication the 4-T centres were emailed a press release and letter detailing the headline trial results and were asked to forward a copy of the letter to all trial participants as soon as possible. Subsequently patients were invited to complete a questionnaire in which they were asked to assess the results letter they received, identify the main findings of the study from a given list and comment on the results in their own words. The questionnaires were returned in pre-paid envelopes to the 4-T Co-ordinating Centre in Oxford, where the responses were entered into a simple database. Free text responses were reviewed and categorised by two researchers.

## Results

By the end of the 4-T trial 596 of the 708 originally randomised patients had not withdrawn consent, were still alive and in contact with sites. Of these, 455 (76%) from 34 (59%) of the 58 trial centres were invited to complete the questionnaire. 40 (9%) questionnaires were received by the Co-ordinating Centre.

Responses are summarised in Tables 1-2.

*Table 1: General Information about the 4-T Trial and medical research*

|                                                                              | Yes | No | Unsure | Not Answered | Total |
|------------------------------------------------------------------------------|-----|----|--------|--------------|-------|
| Did you understand the results presented in the letter                       | 35  | 1  | 4      | 0            | 40    |
| Were you satisfied with the information in the letter                        | 39  | 1  | 0      | 0            | 40    |
| Were you satisfied with the time you spent learning the results of the trial | 37  | 1  | 1      | 1            | 40    |
| Did you understand the results presented to you today                        | 35  | 4  | 1      | 0            | 40    |
| Do you understand the risks/benefits of each insulin in the trial            | 37  | 0  | 3      | 0            | 40    |
| Do you know how to manage your diabetes in the immediate future              | 38  | 0  | 1      | 1            | 40    |

|                                                                                                                                             |    |    |    |   |    |
|---------------------------------------------------------------------------------------------------------------------------------------------|----|----|----|---|----|
| Was the information in the letter appropriate                                                                                               | 36 | 1  | 3  | 0 | 40 |
| Was the information in the letter useful                                                                                                    | 37 | 1  | 2  | 0 | 40 |
| Was the 4-T trial experience as you expected                                                                                                | 37 | 1  | 2  | 0 | 40 |
| Would you take part in a similar trial again                                                                                                | 34 | 1  | 3  | 2 | 40 |
| Would knowing at the start of the trial that you would receive the results at the end influence your decision to take part in another trial | 31 | 3  | 5  | 1 | 40 |
| Did receiving these results improve your experience of the trial as a whole                                                                 | 34 | 2  | 3  | 1 | 40 |
| Would you like to attend a coffee morning to learn more about the results of the 4-T Trial                                                  | 19 | 10 | 10 | 1 | 40 |
| Would you like to take part in a teleconference to learn more about the results of the 4-T Trial                                            | 5  | 18 | 15 | 2 | 40 |

Table 2: Reasons for taking part in the 4-T Trial and patient experience during the trial

|                                                                                                                                            |    |
|--------------------------------------------------------------------------------------------------------------------------------------------|----|
| <b>Why did you take part in the 4-T Trial?</b> (patients were invited to add free text and could specify more than one reason)             |    |
| Clinical Care team recommendation                                                                                                          | 17 |
| Improving own control                                                                                                                      | 15 |
| Helping patients in the future                                                                                                             | 11 |
| Care in trial better than standard                                                                                                         | 10 |
| Improve personal control of diabetes                                                                                                       | 8  |
| Wanted to find out more about diabetes                                                                                                     | 4  |
| Needed insulin for treatment of diabetes                                                                                                   | 4  |
| 4-T was a 'no risk' trial                                                                                                                  | 2  |
| Wanted to share experiences of diabetes with others                                                                                        | 2  |
| <b>Did you find anything unpleasant whilst in the trial?</b> (patients were invited to add free text and were not limited to one negative) |    |
| Nothing/No answer                                                                                                                          | 28 |
| Small inconveniences                                                                                                                       | 7  |
| - SMCG readings                                                                                                                            | 3  |
| - Attending clinic visits                                                                                                                  | 3  |
| - Weight gain                                                                                                                              | 3  |

|                                                                              |    |
|------------------------------------------------------------------------------|----|
| - Blood tests                                                                | 1  |
| <b>Evidence of Understanding</b>                                             |    |
| Different types of insulin are associated with different hypoglycaemia rates | 17 |
| Hypoglycaemia is a risk with insulin treatment                               | 11 |
| Insulin treatment was not associated with weight gain                        | 10 |
| Insulin treatment lowered blood glucose                                      | 6  |
| <i>Identified all correct responses and no incorrect responses</i>           | 5  |

When asked to describe the results in their own words five patients specifically referred to the different effects of each insulin: (T40001D: “Different types of Insulin effect (sic) people in different ways.”; T42001R: “This study has shown that although there are various different types of Insulin which are used to manage the patients HbA1c levels. They were seen to give different side effects such as differing weight gains for each type. Which then increases the need to increase insulin dosage to maintain levels and also varying amounts of hypoglycaemic episodes. Thus resulting in better info for GP's to judge which type is better for each individual patient.”; T54007Y: “Study has shown differences in control of hypoglycaemia and weight gain between the different insulins but overall all three improved control and after 3 years all groups had a similar HbA1c value.”). However, just one of these five (T54007Y) also answered appropriately to the pre-specified results.

Ten patients' assessments of the trial focused on how the trial had improved their personal diabetes control, one acknowledging a treatment effect of the second insulin formulation (T54002C: “although I had many hypo's in the earlier 2 years they did lessen towards the end; which also shows the use of the 2 insulins gives greater control.”) and a further ten said the trial had led to a better understanding of diabetes in general.



1  
2  
3  
4  
5  
6  
7  
8  
9  
10  
11  
12  
13  
14  
15  
16  
17  
18  
19  
20  
21  
22  
23  
24  
25  
26  
27  
28  
29  
30  
31  
32  
33  
34  
35  
36  
37  
38  
39  
40  
41  
42  
43  
44  
45  
46  
47  
48  
49  
50  
51  
52  
53  
54  
55  
56  
57  
58  
59  
60

Nine others responded with seven different explanations including a recognition that insulin treatment lowers blood glucose, that a computerised algorithm was used to control glucose levels (T42023R: “All the way through the study my glucose levels were fed into the computers and the amount of insulin increase was recorded, when the trial was over I had no knowledge of how to adjust the insulin for myself”) and that research leads to improved medical care (T40005E: “That research can and does have benefits for users of insulin and future treatment decisions”, T24008S: “The 4T study showed me and I hope others that with the help that I got will open their eyes as to what work has being done by people that care in study so much”)

Five patients did not complete this section of the questionnaire.

## Conclusion

Several 4-T centres did not want to take part in this ancillary research which limited the scope as we were only able to contact approximately half of the original participants. There were long delays in local approval processes which we believe contributed to the disappointing response rate. It is also apparent that the small number of patients who chose to complete the questionnaire felt well-informed about the trial and for the most part had a positive trial experience. This is likely to have influenced their decision to return the documents to Oxford therefore care should be taken to extrapolate these results to describe the general patient experience in 4-T.

As we found previously[3], patient comments clearly demonstrate appreciation for both trial and local clinical staff. As before, there is no evidence to support the argument that participants are not interested in receiving results[5] rather the opposite was true. This supports the need for researchers to share the full results and not just the information which will affect an individual’s future care as has often been the case previously[5]. Another study disseminated results to patients by means of a teleconference[6] and this

1  
2  
3 was warmly received by the press[7]. We were keen to see if this would be widely received as an  
4 acceptable method for the 4-T patients. It is interesting to note the lack of interest expressed compared  
5 with the coffee morning option. This may be because some of these patients had a previous positive  
6 experience of a 4-T coffee morning at the end of the first year. It also may be related to the average age of  
7 the 4-T patient ( $61.7 \pm 9.8$  years at randomisation) compared with the younger age group (~50years) of the  
8 Huntington disease trial.  
9  
10  
11  
12  
13  
14  
15  
16  
17

18 Although most patients chose at least one of the correct options for the results of the trial, when asked to  
19 describe the findings in their own words we found patients' tended to focus on their individual care with  
20 over a quarter describing personal improvements in diabetes control. This correlates with the reasons why  
21 patients entered the trial (table 2), is consistent with other recent research[8] and indicates that the  
22 purpose of clinical research is not well understood by the public, and we suggest this should be better  
23 explained at the outset, and reinforced during trials.  
24  
25  
26  
27  
28  
29  
30  
31  
32

33 Communication of scientific research to lay audiences is a key area for both academic and political  
34 communities. Science scepticism is common in developed nations yet only 25% of European and  
35 American public are considered 'scientifically literate'[9]. Researchers have a responsibility therefore to  
36 report their work; the Canadian Health Services Research Foundation recommends that when considering  
37 dissemination, information is "clear, simple...tailored for each audience based on knowledge user  
38 need"[10]. It is a requirement that trials registered with ClinicalTrials.gov publish results in the public  
39 domain and the 4-T results are available in full. We postulate however that these are not presented in a  
40 way that encourages lay review. Our research shows that patients are interested in the main results, and  
41 feel that they are able to understand them, if they are presented in an appropriate way.  
42  
43  
44  
45  
46  
47  
48  
49  
50  
51  
52  
53  
54  
55  
56  
57  
58  
59  
60

1  
2  
3 Assessment of patient understanding based on information received in a results letter was positive but we  
4  
5 feel there are some aspects which should be addressed to improve the knowledge base in this area. The 4-  
6  
7 T model of providing results to participants via a social event was well received by participants and  
8  
9 clinical centres and shows promise as a method of disseminating information. It remains to be seen if the  
10  
11 interactive opportunities offered by local coffee mornings would lead to greater understanding of research  
12  
13 in general.  
14  
15

16  
17  
18 The main 4-T Study was funded and sponsored by Novo Nordisk Ltd. This ancillary research received no  
19  
20 specific grant from any funding agency in the public, commercial or not-for-profit sectors.  
21  
22

#### 23 24 25 **Data Sharing**

26  
27 Original data are available on request from the Diabetes Trials Unit. Please contact the corresponding  
28  
29 author in the first instance.  
30

#### 31 32 **Contributorship**

33  
34 JLD and HCP devised the study and wrote the protocol. JLD wrote the initial draft of the manuscript.  
35  
36 Both authors take responsibility for the final content.  
37

#### 38 39 **Funding**

40  
41 None

#### 42 43 **Competing Interests**

44  
45 JLD has no competing interests. HCP has received payment from Novo Nordisk for sitting on advisory  
46  
47 panels and also from Novo Nordisk, Eli Lilly, Sanofi and Boehringer Ingelheim for lectures and travel  
48  
49 expenses.  
50  
51  
52  
53  
54  
55  
56  
57  
58  
59  
60

## References

- 1 Chen PG, Diaz N, Lucas G, et al. Dissemination of results in community-based participatory research.  
2  
3  
4  
5  
6 Am J Prev Med 2010;**39**:372-8  
7
- 8  
9  
10 2 Holman R, Thorne K, Farmer A, et al. Addition of Biphasic, Prandial, or Basal Insulin to Oral Therapy  
11  
12 in Type 2 Diabetes. N Eng J Med 2007;**357**:1716-30  
13
- 14 3 Darbyshire JL, Holman RR, Price HC, Clin Med 2009;**9**:415-416  
15
- 16 4 Holman RR, Farmer AJ, Davies MJ, et al. for the 4-T Study Group, Three-year efficacy of complex  
17  
18 insulin regimens in type 2 diabetes. N Eng J Med 2009;**361**:1736-47  
19
- 20 5 Partridge A, Hackett N, Blood E, et al. Oncology physician and nurse practices and attitudes regarding  
21  
22 offering clinical trial results to study participants. J Nat Cancer Inst 2004;**96**:629-32  
23
- 24 6 Dorsey ER, Beck CA, Adams M, et al. Communicating Clinical Trial Results to Research Participants.  
25  
26 Arch Neurol 2008;**65**:1590-1595  
27
- 28 7 Flore K. Clinical Trial Participants Often Left in the Dark on Results. 2008.  
29  
30 <http://www.medpagetoday.com/PublicHealthPolicy/ClinicalTrials/12088> [Accessed February 2012]  
31  
32
- 33 8 Locock L, Smith L. Personal experiences of taking part in clinical trials – A qualitative study, J Patient  
34  
35 Educ Couns 2011;**84**:303-309 doi:10.1016/j.pec.2011.06.002  
36  
37
- 38 9 Hargreaves I, Ferguson G. Who's Misunderstanding Whom? Economic and Social Research Council  
39  
40 report, 12 September 2000 [http://www.esrc.ac.uk/\\_images/Whos\\_misunderstanding\\_whom\\_tcm8-](http://www.esrc.ac.uk/_images/Whos_misunderstanding_whom_tcm8-13560.pdf)  
41  
42 [13560.pdf](http://www.esrc.ac.uk/_images/Whos_misunderstanding_whom_tcm8-13560.pdf) [Accessed February2012]  
43  
44
- 45 10 Gagnon ML. Moving knowledge to action through dissemination and exchange. J Clin Epid  
46  
47 2011;**64**:25-31 doi 10.1016/j.jclinepi.2009.08.013  
48  
49  
50  
51  
52  
53  
54  
55  
56  
57  
58  
59  
60



**DISSEMINATING RESULTS TO CLINICAL TRIAL PARTICIPANTS: A QUALITATIVE REVIEW OF PATIENT UNDERSTANDING IN A POST-TRIAL POPULATION**

|                                 |                                                                                                                              |
|---------------------------------|------------------------------------------------------------------------------------------------------------------------------|
| Journal:                        | <i>BMJ Open</i>                                                                                                              |
| Manuscript ID:                  | bmjopen-2012-001252.R1                                                                                                       |
| Article Type:                   | Research                                                                                                                     |
| Date Submitted by the Author:   | 27-Jun-2012                                                                                                                  |
| Complete List of Authors:       | Darbyshire, Julie; University of Oxford, Diabetes Trials Unit<br>Price, Hermione; University of Oxford, Diabetes Trials Unit |
| <b>Primary Subject Heading</b>: | Communication                                                                                                                |
| Secondary Subject Heading:      | Diabetes and endocrinology, Ethics, Patient-centred medicine, Qualitative research, Research methods                         |
| Keywords:                       | MEDICAL ETHICS, General diabetes < DIABETES & ENDOCRINOLOGY, QUALITATIVE RESEARCH                                            |
|                                 |                                                                                                                              |

SCHOLARONE™  
Manuscripts

1  
2  
3  
4  
5  
6  
7  
8  
9  
10  
11  
12  
13  
14  
15  
16  
17  
18  
19  
20  
21  
22  
23  
24  
25  
26  
27  
28  
29  
30  
31  
32  
33  
34  
35  
36  
37  
38  
39  
40  
41  
42  
43  
44  
45  
46  
47  
48  
49  
50  
51  
52  
53  
54  
55  
56  
57  
58  
59  
60

**Disseminating results to clinical trial participants: a qualitative review of patient understanding in a post-trial population**

**Word Count: 1901**

For peer review only

## Structured Abstract

*Objective:* To identify the most appropriate format for results dissemination to maximise understanding of trial results

*Design:* Qualitative

*Setting:* Of the original 58 4-T Trial centres, 34 agreed to take part in this ancillary research.

*Participants:* All participants from these centres were eligible. 343 participants were sent questionnaires.

*Primary & Secondary outcome measures:* The low response rate meant that we were unable to make any firm conclusions about the patient preferred method of dissemination however we were able to comment on the level of understanding demonstrated by the trial participants.

*Results:* 40 (12%) questionnaires were returned from 15 centres. We received no questionnaires from over half of the centres. The questionnaires which were returned demonstrated broad satisfaction with the results letter, general enthusiasm for the trial and a variable level of understanding of the results, however there was a high proportion of responders who were not clear on why the research was undertaken or what the results meant.

*Conclusions:* The low response rate may be related to delays during the trial set-up process suggesting that interest in a study quickly wanes for both patients and centres. From this we deduce that rapid dissemination of results is needed if it is to have any impact at all. The responders are likely to reflect a biased cohort who were both enthusiastic about the research and who had a good experience during their three years in the 4-T trial. It is perhaps not surprising therefore that the overview is positive. That this population was still not fully informed about the purpose of the research would seem to confirm a low level of understanding amongst the general public which we suggest should be addressed during the consent process.

1  
2  
3 *Trial Registration: Original 4-T Trial Registration ISRCTN51125379*  
4  
5  
6  
7

8 **Summary**  
9

10 **Article Focus**

11  
12  
13 \* Investigation into participant satisfaction with method of dissemination and understanding of  
14 clinical trial results  
15

16  
17  
18 \* Exploration into reasons for participation in clinical trials  
19

20  
21 \* Suggestions to improve patient response to post-study questionnaires  
22

23 **Key Messages**  
24

25 \* Responders were broadly satisfied with their trial experience but rarely demonstrated good  
26 understanding of results beyond their own treatment needs  
27

28  
29  
30 \* Study interest seems to wane quickly for both patients and centres  
31

32 \* Results dissemination needs to form part of protocol development and circulated soon after the  
33 end of the trial  
34  
35

36  
37 **Strengths and Limitations**  
38

39 \* The low response rate was disappointing, especially as it is likely that those who returned their  
40 questionnaires had a positive trial experience leading to a potential bias in the results  
41  
42

43  
44 \* That this motivated population still demonstrated limited understanding of the research  
45 indicates that more needs to be done at the time of consent and during the trial  
46  
47  
48  
49  
50  
51  
52  
53  
54  
55  
56



## Objective

Clinical trial results are generally published within the healthcare community and rarely disseminated beyond scientific publications[1]. However it is increasingly a requirement of research approvals that, wherever possible, the public is involved at all stages of research. It is desirable that results are shared with those who take part, but there remains no consensus on the best method of disseminating study findings. Additionally, although patients participate willingly in clinical trials, it is not known if they are aware of the purpose of their trial, or if patients are actually interested in the results. We have presented information collected retrospectively from clinical centres who had held a patient event to share interim results from the three-year Treat to Target in Type 2 Diabetes (4-T) Trial (ISRCTN51125379)[2] [3]. This experience informed the design of the current work.

This ‘coffee morning’ approach proved popular with patients, and staff did not find this onerous to organise, but whilst patients demonstrated awareness of the implications for their own future care, it remained unclear if patients fully understood the results of the study as a whole.

The 4-T trial was an open-label, multi-centre trial in which 708 type 2 diabetic participants with sub-optimal control (glycated haemoglobin 7.0–10.0%) using oral agents were randomized to the addition of a basal, biphasic or prandial insulin regimen. Patients were followed for three years and a second insulin formulation was added if glycaemic control remained inadequate. The final results concluded that patients initiated onto the long acting insulin detemir who later added prandial doses of aspart achieved good glycaemic control with a lower risk of hypoglycaemia and less weight gain than patients initiated onto either the biphasic aspart or aspart insulins[4]. Trial results were disseminated to all participants at the end of the study, and we decided to assess the level of understanding amongst those who took part, as well as their level of satisfaction with the trial experience.

## Design

Simultaneously with peer-reviewed publication, the 4-T centres were emailed a press release and letter detailing the headline results and asked to forward a copy of the letter to all trial participants as soon as possible. Subsequently patients were invited to complete a questionnaire in which they were asked to assess the results letter, identify the main findings of the study from a given list and comment on the results in their own words. The questionnaires were returned in pre-paid envelopes to the Co-ordinating Centre where responses were entered into a simple database. Free text was reviewed and categorised by two researchers. The research was approved in the UK by Oxford REC B; ref 09/H0605/100 and by individual sites in Ireland.

## Results

By the end of the 4-T trial 577 (81%) of the 708 originally randomised patients were still alive and had not withdrawn consent. Of these, 234 patients (41%) were ineligible as their home site did not take part in this results study. A total of 343 (59%) patients from 34 (61%) trial centres were invited to complete the questionnaire. 40 (12%) questionnaires were received from 15 (44%) sites. Responses are summarised in Tables 1 to 3. Responder demographics (Table 4) did not differ from the main trial.

*Table 1: Patient satisfaction with the results letter*

|   |                                                  | Completely Dissatisfied | Dissatisfied | Neither satisfied nor dissatisfied | Satisfied | Completely Satisfied | No Answer | Total |
|---|--------------------------------------------------|-------------------------|--------------|------------------------------------|-----------|----------------------|-----------|-------|
| 1 | The time taken to learn the results of the study | 1                       | 0            | 4                                  | 20        | 15                   | 0         | 40    |
| 2 | The source of information given today            | 1                       | 0            | 0                                  | 26        | 13                   | 0         | 40    |

|   |                                             |   |   |   |    |    |   |    |
|---|---------------------------------------------|---|---|---|----|----|---|----|
| 3 | Satisfaction with the source of information | 1 | 0 | 1 | 23 | 14 | 1 | 40 |
|---|---------------------------------------------|---|---|---|----|----|---|----|

Table 2: General information about the 4-T Trial and medical research

|    |                                                                                                                       | Strongly Disagree | Disagree | Neither agree nor disagree | Agree | Agree Strongly | No Answer | Total |
|----|-----------------------------------------------------------------------------------------------------------------------|-------------------|----------|----------------------------|-------|----------------|-----------|-------|
| 4  | I understood the results presented to me today                                                                        | 0                 | 1        | 4                          | 25    | 10             | 0         | 40    |
| 5  | I understand the risks and benefits of each insulin                                                                   | 0                 | 0        | 3                          | 28    | 9              | 0         | 40    |
| 6  | I understand what I need to do to continue with my diabetes medication                                                | 0                 | 0        | 1                          | 22    | 16             | 1         | 40    |
| 7  | The information content of the patient results letter was about right.                                                | 0                 | 1        | 3                          | 31    | 5              | 0         | 40    |
| 8  | The patient results letter was useful/informative?                                                                    | 0                 | 1        | 2                          | 32    | 5              | 0         | 40    |
| 9  | Taking part in the 4-T trial was as I expected                                                                        | 1                 | 0        | 2                          | 24    | 13             | 0         | 40    |
| 10 | I would participate in a similar study again                                                                          | 1                 | 0        | 3                          | 11    | 23             | 2         | 40    |
| 11 | I would be more likely to take part in a clinical trial if I knew I would receive the results of the trial at the end | 1                 | 2        | 5                          | 17    | 14             | 1         | 40    |
| 12 | Receiving the study results improved the overall experience of taking part                                            | 1                 | 1        | 3                          | 18    | 16             | 1         | 40    |
| 13 | I would have preferred to attend a coffee morning to learn the trial results                                          | 3                 | 7        | 10                         | 7     | 12             | 1         | 40    |
| 14 | I would have preferred to take part in a telephone conference to learn the trial results                              | 6                 | 12       | 15                         | 3     | 2              | 2         | 40    |

Table 3: Reasons for taking part in the 4-T Trial and patient experience during the trial

|                                                                                                                                                     |    |
|-----------------------------------------------------------------------------------------------------------------------------------------------------|----|
| <b>Why did you take part in the 4-T Trial?</b> (patients were invited to add free text and could specify more than one reason)                      |    |
| Clinical Care team recommendation                                                                                                                   | 17 |
| Improving own control                                                                                                                               | 15 |
| Helping patients in the future                                                                                                                      | 11 |
| Care in trial better than standard                                                                                                                  | 10 |
| Improve personal control of diabetes                                                                                                                | 8  |
| Wanted to find out more about diabetes                                                                                                              | 4  |
| Needed insulin for treatment of diabetes                                                                                                            | 4  |
| 4-T was a 'no risk' trial                                                                                                                           | 2  |
| Wanted to share experiences of diabetes with others                                                                                                 | 2  |
| <b>Did you find anything unpleasant whilst in the trial?</b> (patients were invited to add free text and were not limited to one negative response) |    |
| Nothing/No answer                                                                                                                                   | 28 |
| Small inconveniences                                                                                                                                | 7  |
| - SMCG readings                                                                                                                                     | 3  |
| - Attending clinic visits                                                                                                                           | 3  |
| - Weight gain                                                                                                                                       | 3  |
| - Blood tests                                                                                                                                       | 1  |
| <b>Evidence of Understanding</b>                                                                                                                    |    |
| Different types of insulin are associated with different hypoglycaemia rates                                                                        | 17 |
| Hypoglycaemia is a risk with insulin treatment                                                                                                      | 11 |
| Insulin treatment was not associated with weight gain                                                                                               | 10 |
| Insulin treatment lowered blood glucose                                                                                                             | 6  |
| <i>Identified <b>all</b> correct responses and <b>no</b> incorrect responses</i>                                                                    | 5  |

1  
2  
3  
4  
5  
6  
7  
8  
9  
10  
11  
12  
13  
14  
15  
16  
17  
18  
19  
20  
21  
22  
23  
24  
25  
26  
27  
28  
29  
30  
31  
32  
33  
34  
35  
36  
37  
38  
39  
40  
41  
42  
43  
44  
45  
46  
47  
48  
49  
50  
51  
52  
53  
54  
55  
56  
57  
58  
59  
60

When asked to describe the results in their own words five patients referred to the different effects of each insulin (T40001D: “Different types of Insulin effect (sic) people in different ways.”; T42001R: “This study has shown that although there are various different types of Insulin which are used to manage the patients HbA1c levels. They were seen to give different side effects such as differing weight gains for each type. Which then increases the need to increase insulin dosage to maintain levels and also varying amounts of hypoglycaemic episodes. Thus resulting in better info for GP's to judge which type is better for each individual patient.”; T54007Y: “Study has shown differences in control of hypoglycaemia and weight gain between the different insulins but overall all three improved control and after 3 years all groups had a similar HbA1c value.”). However just one (T54007Y) also selected the appropriate options from those offered in the questionnaire.

Ten patients’ assessments of the trial focused on how the trial had improved their personal diabetes control, one acknowledging a treatment effect of the second insulin formulation (T54002C: “although I had many hypo's in the earlier 2 years they did lessen towards the end; which also shows the use of the 2 insulins gives greater control.”) and a further ten said the trial had led to a better understanding of diabetes in general. Nine others responded with seven different explanations including the recognition that insulin treatment lowers blood glucose, that a computerised algorithm was used to control glucose levels (T42023R: “All the way through the study my glucose levels were fed into the computers and the amount of insulin increase was recorded, when the trial was over I had no knowledge of how to adjust the insulin for myself”) and that research leads to improved medical care (T40005E: “That research can and does have benefits for users of insulin and future treatment decisions”, T24008S: “The 4T study showed me and I hope others that with the help that I got will open their eyes as to what work has being done by people that care in study so much”). Five patients did not complete this section of the questionnaire.

Table 4: Demographics of those who returned their questionnaire compared against the main 4-T Study

|                        | <b>Dissemination Study</b> | <b>Main Study</b> | p-value (t-test) |
|------------------------|----------------------------|-------------------|------------------|
| <b>Gender</b>          |                            |                   |                  |
| Number female N (%)    | 14 (35.0)                  | 254 (35.9)        |                  |
| Number male N (%)      | 26 (65.0)                  | 454 (64.1)        |                  |
| <i>Total</i>           | <i>40</i>                  | <i>708</i>        | <i>0.91</i>      |
| <b>Race</b>            |                            |                   |                  |
| Number white N (%)     | 37 (92.5)                  | 635 (92.2)        |                  |
| Number non-white N (%) | 3 (7.5)                    | 73 (7.8)          |                  |
| <i>Total</i>           | <i>40</i>                  | <i>708</i>        | <i>0.57</i>      |
| <b>Age</b>             |                            |                   |                  |
| Mean (SD)              | 64.1(±8.2)                 | 61.7(±9.8)        | 1.68             |

## Conclusion

The disappointingly low response rate was a surprise, however we can suggest reasons for the apparent lack of interest. This additional research was developed towards the end of the main study and neither patients nor sites were expecting further involvement beyond their final 4-T visit. We also experienced long delays in local approval processes. We have no robust statistics, but many local R&D offices took a very long time to review the documents, some requiring us to re-submit more than once. We believe these delays directly impacted on the response rate since rather than being able to send the recruitment packs to 4-T patients soon after the trial results were published in October 2009, they were eventually circulated six to eight months later. For all patients this would have been almost twelve months after they had completed the trial; for many it would have been up to two and a half years after their final 4-T visit. It is possible patients felt disconnected from the trial, or that the results had little relevance to them at this late stage.

Interestingly 23 (41%) of the original 4-T centres declined to take part in this follow-on study. By the time they were asked to distribute recruitment packs many centres had archived their 4-T files and any loyalty they may have had towards 4-T is likely to have been supplanted by newer research studies. Additionally, we received no patient questionnaires from 19 (56%) of the 34 sites who did agree to take part, and it is possible the recruitment packs were not circulated. We have no detailed statistics on reasons for site refusal but anecdotally we can report that some were reluctant to distribute recruitment packs on behalf of the research team as there was no financial recompense. The study was also ineligible for the NIHR Research Network portfolio for the same reason. Whilst we appreciate that R&D offices have a responsibility to ensure their staff are adequately resourced, we feel that this low budget ancillary study is something that the network could have supported. With hindsight it may have been beneficial to convert the 4-T research sites to Patient Identification Centres and request permission from the National Information Governance Board for Health and Social Care to recruit via the central co-ordinating office.

1  
2  
3 Had we been able to contact patients directly we may have had better representation as we would have  
4 been able to include all 577 patients in the initial recruitment phase. We would also have been able to  
5 follow up non responders which we were unable to do through the sites, although this is recommended  
6 practice[5].  
7  
8  
9  
10

11  
12  
13  
14 Although we initially intended to investigate patient understanding of trial results and the preferred  
15 method of receiving end of trial information, the low response rate makes it difficult to extrapolate  
16 findings to the wider population. It is clear that the most of the patients who completed the questionnaire  
17 felt well-informed about the trial and for the most part had a positive trial experience. This is likely to  
18 have influenced their decision to return the documents therefore care should be taken when interpreting  
19 these results.  
20  
21  
22  
23  
24  
25  
26

27  
28  
29 As we found previously[3], patients clearly demonstrate appreciation for local clinical staff. Our results in  
30 table 1 suggests that although there is a cohort of patients who are not interested in the trial beyond their  
31 own treatment, the majority of patients thought receiving the results improved their trial experience. This  
32 supports the need to share the full results and not just information which will affect an individual's future  
33 care as has often been the case previously[6]. Another study disseminated results via teleconference[7]  
34 and this was warmly received by the press[8]. We were keen to see if this would be widely received as an  
35 acceptable method for 4-T patients. It is interesting to note the lack of interest expressed compared with  
36 the coffee morning option. This may be because some patients had a previous positive experience of a 4-T  
37 coffee morning. It also may relate to the age of 4-T patients, who were on average over ten years older  
38 than the Huntington disease patients. The Huntington patients may also have had greater levels of  
39 disability, which might constrain their choice of medium for results dissemination.  
40  
41  
42  
43  
44  
45  
46  
47  
48  
49  
50  
51  
52  
53  
54  
55  
56  
57  
58  
59  
60



1  
2  
3 Although most patients chose at least one correct option for the trial results, when asked to describe the  
4 findings in their own words we found patients tended to focus on their individual care with over a quarter  
5 describing personal improvements in diabetes control. This correlates with the reasons why patients  
6 entered the trial (table 2), is consistent with other research[9, 10], and indicates that the purpose of clinical  
7 research is not well understood by the public. We suggest this should be better communicated at the  
8 outset, and then reinforced throughout the trial process.  
9  
10  
11  
12  
13  
14  
15  
16  
17

18 Communication of scientific research to lay audiences is a priority for both academic and political  
19 communities. Scientific scepticism is common in developed nations, yet only 25% of European and  
20 American public are considered ‘scientifically literate’[11]. Researchers have a responsibility to report  
21 their work and the Canadian Health Services Research Foundation recommends that when considering  
22 dissemination, information is “clear, simple...tailored for each audience based on knowledge user  
23 need”[12]. It is a requirement that trials registered with ClinicalTrials.gov publish in the public domain,  
24 and 4-T results are available via this website. We postulate however that the ClinicalTrials.gov template  
25 does not encourage lay review.  
26  
27  
28  
29  
30  
31  
32  
33  
34  
35  
36  
37

38 The 4-T model of providing results to participants via a social event was well received by patients and  
39 sites and shows promise as a method of sharing information. We believe this study illustrates that results  
40 dissemination plans should occur alongside protocol development forming part of the overall study and  
41 included in reimbursement calculations. We have perhaps also shown that interest in studies quickly  
42 wanes for both patients and centre staff so any dissemination is likely to be needed rapidly if it is to have  
43 any impact at all. It remains to be seen if the interactive opportunities offered by local coffee mornings  
44 would lead to greater understanding of research in general.  
45  
46  
47  
48  
49  
50  
51  
52  
53  
54  
55  
56  
57  
58  
59  
60

**Data Sharing**

Original data are available on request from the Diabetes Trials Unit, University of Oxford. Please contact the corresponding author in the first instance.

**Contributorship**

JLD and HCP devised the study and wrote the protocol. JLD wrote the initial draft of the manuscript.

Both authors take responsibility for the final content.

**Acknowledgements**

The authors would like to thank the patients and staff of the 4-T study for their time and interest in the research. They would also like to thank Ada Tse of the Diabetes Trials Unit for administrative support before, during and after the study.

**Funding**

The main 4-T Study was funded and sponsored by Novo Nordisk Ltd. This ancillary research received no specific grant from any funding agency in the public, commercial or not-for-profit sectors.

**Competing Interests**

JLD has no competing interests. HCP has received payment from Novo Nordisk for sitting on advisory panels and also from Novo Nordisk, Eli Lilly, Sanofi and Boehringer Ingelheim for lectures and travel expenses.

## References

- 1 Chen PG, Diaz N, Lucas G, et al. Dissemination of results in community-based participatory research.  
2  
3  
4  
5  
6 Am J Prev Med 2010;**39**:372-8  
7
- 8  
9  
10 2 Holman R, Thorne K, Farmer A, et al. Addition of Biphasic, Prandial, or Basal Insulin to Oral Therapy  
11  
12 in Type 2 Diabetes. N Eng J Med 2007;**357**:1716-30  
13
- 14 3 Darbyshire JL, Holman RR, Price HC, Presenting the results of clinical trials to participants, Clin Med  
15  
16 2009;**9**:415-416  
17
- 18 4 Holman RR, Farmer AJ, Davies MJ, et al. for the 4-T Study Group, Three-year efficacy of complex  
19  
20 insulin regimens in type 2 diabetes. N Eng J Med 2009;**361**:1736-47  
21  
22
- 23 5 McColl E, Jacoby A, Thomas L et al. Design and use of questionnaires: a review of best practice  
24  
25 applicable to surveys of health service staff and patients. Health Technology Assessment 2001;**5**(31)  
26  
27
- 28 6 Partridge A, Hackett N, Blood E, et al. Oncology physician and nurse practices and attitudes regarding  
29  
30 offering clinical trial results to study participants. J Nat Cancer Inst 2004;**96**:629-32  
31
- 32 7 Dorsey ER, Beck CA, Adams M, et al. Communicating Clinical Trial Results to Research Participants.  
33  
34 Arch Neurol 2008;**65**:1590-1595  
35
- 36 8 Flore K. Clinical Trial Participants Often Left in the Dark on Results. 2008.  
37  
38 <http://www.medpagetoday.com/PublicHealthPolicy/ClinicalTrials/12088> [Accessed February 2012]  
39
- 40 9 Locock L, Smith L. Personal experiences of taking part in clinical trials – A qualitative study, J Patient  
41  
42 Educ Couns 2011;**84**:303-309 doi:10.1016/j.pec.2011.06.002  
43  
44
- 45 10 Lawton J, Fox A, Fox C, et al. Participating in the UKPDS: a qualitative study of patients' experiences.  
46  
47 Br J of General Prac 2003;**53**:394-398  
48
- 49 11 Hargreaves I, Ferguson G. Who's Misunderstanding Whom? Economic and Social Research Council  
50  
51 report, 12 September 2000 [http://www.esrc.ac.uk/\\_images/Whos\\_misunderstanding\\_whom\\_tcm8-  
52  
53  
54  
55  
56  
57  
58  
59  
60](http://www.esrc.ac.uk/_images/Whos_misunderstanding_whom_tcm8-13560.pdf) [13560.pdf](http://www.esrc.ac.uk/_images/Whos_misunderstanding_whom_tcm8-13560.pdf) [Accessed February2012]

1  
2  
3  
4  
5  
6  
7  
8  
9  
10  
11  
12  
13  
14  
15  
16  
17  
18  
19  
20  
21  
22  
23  
24  
25  
26  
27  
28  
29  
30  
31  
32  
33  
34  
35  
36  
37  
38  
39  
40  
41  
42  
43  
44  
45  
46  
47  
48  
49  
50  
51  
52  
53  
54  
55  
56  
57  
58  
59  
60

12 Gagnon ML. Moving knowledge to action through dissemination and exchange. J Clin Epid  
2011;**64**:25-31 doi 10.1016/j.jclinepi.2009.08.013

For peer review only

Ethics Number: 09/H0605/100

Version 1.1

9<sup>th</sup> October 2009

## Communicating Clinical Trial Results to Participants Questionnaire

Subject no:        Questionnaire no:

Initials:    Date   /   /

**We are interested in your views on the information presented to you today. There are no right or wrong answers. Please answer each statement by CIRCLING a number on the scale provided to indicate how like you the statement is. If you make a mistake, please cross it out using a single line.**

**Please complete the questionnaire using a BLACK pen and not pencil.**

**THANK YOU**

## Communicating Clinical Trial Results to Participants Questionnaire

|    |                                                  | <b>Completely dissatisfied</b> | <b>Dissatisfied</b> | <b>Neither satisfied Nor dissatisfied</b> | <b>Satisfied</b> | <b>Completely satisfied</b> |
|----|--------------------------------------------------|--------------------------------|---------------------|-------------------------------------------|------------------|-----------------------------|
| 1. | The time taken to learn the results of the study | 1                              | 2                   | 3                                         | 4                | 5                           |
| 2. | The source of information given today            | 1                              | 2                   | 3                                         | 4                | 5                           |
| 3. | Satisfaction with the source of information      | 1                              | 2                   | 3                                         | 4                | 5                           |

|    |                                                                        | <b>Strongly Disagree</b> | <b>Disagree</b> | <b>Neither Agree Nor Disagree</b> | <b>Agree</b> | <b>Strongly Agree</b> |
|----|------------------------------------------------------------------------|--------------------------|-----------------|-----------------------------------|--------------|-----------------------|
| 4. | I understood the results presented to me today                         | 1                        | 2               | 3                                 | 4            | 5                     |
| 5. | I understand the risks and benefits of each insulin                    | 1                        | 2               | 3                                 | 4            | 5                     |
| 6. | I understand what I need to do to continue with my diabetes medication | 1                        | 2               | 3                                 | 4            | 5                     |

|    |                                                                        | <b>Strongly Disagree</b> | <b>Disagree</b> | <b>Neither Agree Nor Disagree</b> | <b>Agree</b> | <b>Strongly Agree</b> |
|----|------------------------------------------------------------------------|--------------------------|-----------------|-----------------------------------|--------------|-----------------------|
| 7. | The information content of the patient results letter was about right. | 1                        | 2               | 3                                 | 4            | 5                     |

## Communicating Clinical Trial Results to Participants Questionnaire

|     |                                                                                                                       | <b>Strongly Disagree</b> | <b>Disagree</b> | <b>Neither Agree Nor Disagree</b> | <b>Agree</b> | <b>Strongly Agree</b> |
|-----|-----------------------------------------------------------------------------------------------------------------------|--------------------------|-----------------|-----------------------------------|--------------|-----------------------|
| 8.  | The patient results letter was useful/informative?                                                                    | 1                        | 2               | 3                                 | 4            | 5                     |
| 9.  | Taking part in the 4-T trial was as I expected                                                                        | 1                        | 2               | 3                                 | 4            | 5                     |
| 10. | I would participate in a similar study again                                                                          | 1                        | 2               | 3                                 | 4            | 5                     |
| 11. | I would be more likely to take part in a clinical trial if I knew I would receive the results of the trial at the end | 1                        | 2               | 3                                 | 4            | 5                     |
| 12. | Receiving the study results improved the overall experience of taking part                                            | 1                        | 2               | 3                                 | 4            | 5                     |
| 13. | I would have preferred to attend a coffee morning to learn the trial results                                          | 1                        | 2               | 3                                 | 4            | 5                     |
| 14. | I would have preferred to take part in a telephone conference to learn the trial results                              | 1                        | 2               | 3                                 | 4            | 5                     |

Which statements do you believe best describes your understanding of the 4-T trial results?

Please **CIRCLE** any that apply

|     |                                                                                                                            |   |
|-----|----------------------------------------------------------------------------------------------------------------------------|---|
| 15. | The results of the 4-T study showed that adding insulin treatment lowers blood glucose levels                              | 1 |
| 16. | The results of the 4-T study showed that hypoglycaemia (very low blood sugar levels) is a risk of taking insulin treatment | 2 |
| 17. | The results of the 4-T study showed that different types of insulin are associated with different risks of hypoglycaemia   | 3 |
| 18. | The results of the 4-T study showed that insulin treatment is not associated with weight gain                              | 4 |

Please Turn Over

Communicating Clinical Trial Results to Participants Questionnaire

1  
2  
3  
4  
5  
6  
7  
8  
9  
10  
11  
12  
13  
14  
15  
16  
17  
18  
19  
20  
21  
22  
23  
24  
25  
26  
27  
28  
29  
30  
31  
32  
33  
34  
35  
36  
37  
38  
39  
40  
41  
42  
43  
44  
45  
46  
47  
48  
49  
50  
51  
52  
53  
54  
55  
56  
57  
58  
59  
60

**19. Why did you take part in the trial in the first place?**

**20. What appealed about taking part in a clinical trial?**

**21. What didn't?**

**22. Please explain in your own words what the 4-T study has shown.**

For peer review only
